# Supplementary material for: A comparison of different scores for diagnosis and mortality prediction of adults with sepsis in Low-and-Middle-Income Countries: a systematic review and meta-analysis
Source: PubMed Central journal article supplement — eClinicalMedicine. 2021 Oct 30;42:101184. doi: 10.1016/j.eclinm.2021.101184 (PMC8569629; doi:10.1016/j.eclinm.2021.101184), 2021-10-30

## **Supplementary Files**

### **Legends**

**-Supplementary File S1.** Literature search strategy

**-Supplementary File S2:** Summary of information required for each prognostic scoring system discussed

**-Supplementary File S3:** Summary for risk of bias of included studies and risk of bias graph for the included studies

**-Supplementary File S4.** List of rejected articles

**-Supplementary File S5:** Funnel plots assessing publication bias. A: qSOFA funnel plot; B: SIRS funnel plot; C: MEWS funnel plot; D: UVA funnel plot

## Supplementary File S1. Literature search strategy

### a) Science Direct

“sequential organ failure assessment “OR “systemic inflammatory response syndrome” OR “universal vital assessment” OR “early warning score” AND (mortality OR diagnostic) AND "sepsis"

b) **Cochrane:** qSOFA OR sirs OR early warning score OR "universal vital assessment"

### c) Pubmed

(qsofa OR sofa OR sirs OR UVA OR, EWS OR news OR news2 OR mews OR "sequential organ failure assessment" OR "systemic inflammatory response syndrome" OR "universal vital assessment" OR "early warning score") AND infect\* AND sepsis

### Additional filter

#1 - ((qsofa OR sofa OR sirs OR UVA OR, EWS OR news OR news2 OR mews OR "sequential organ failure assessment" OR "systemic inflammatory response syndrome" OR "universal vital assessment" OR "early warning score" )AND infect\* AND sepsis) AND (afghanistan OR albania OR algeria OR "american samoa" OR angola OR "antigua and barbuda" OR antigua OR barbuda OR argentina OR armenia OR armenian OR aruba OR azerbaijan OR bahrain OR bangladesh OR barbados OR "republic of belarus" OR belarus OR byelarus OR belorussia OR byelorussian OR belize OR "british honduras" OR benin OR dahomey OR bhutan OR bolivia OR "bosnia and herzegovina" OR bosnia OR herzegovina OR botswana OR bechuanaland OR brazil OR brasil OR bulgaria OR "burkina faso" OR "burkina fasso" OR "upper volta" OR burundi OR urundi OR "cabo verde" OR "cape verde" OR cambodia OR kampuchea OR "khmer republic" OR cameroon OR cameron OR cameroun OR "central african republic" OR "ubangi shari" OR chad OR chile OR china OR colombia OR comoros OR "comoro islands" OR "iles comores" OR mayotte OR "democratic republic of the congo" OR "democratic republic congo" OR congo OR zaire OR "costa rica" OR "cote d'ivoire" OR "cote d'ivoire" OR "cote divoire" OR "cote d ivoire" OR "ivory coast" OR croatia OR cuba OR cyprus OR "czech republic" OR czechoslovakia OR djibouti OR "french somaliland" OR dominica OR "dominican republic" OR ecuador OR egypt OR "united arab republic" OR "el salvador" OR "equatorial guinea" OR "spanish guinea" OR eritrea OR estonia OR eswatini OR swaziland OR ethiopia OR fiji OR gabon OR "gabonese republic" OR gambia OR "georgia (republic)" OR georgia OR georgian OR ghana OR "gold coast" OR gibraltar OR greece OR grenada OR guam OR guatemala OR guinea OR "guinea bissau" OR guyana OR "british guiana" OR haiti OR hispaniola OR honduras OR hungary OR india OR indonesia OR timor OR iran OR iraq OR "isle of man" OR jamaica OR jordan OR kazakhstan OR kazakh OR kenya OR "democratic people's republic of korea" OR "republic of korea" OR north korea OR south korea OR korea OR kosovo OR kyrgyzstan OR kirghizia OR kirgizstan OR "kyrgyz republic" OR kirghiz OR laos OR "lao pdr" OR "lao people's democratic republic" OR latvia OR lebanon OR "lebanese republic" OR lesotho OR basutoland OR liberia OR libya OR "libyan arab jamahiriya"

OR lithuania OR macau OR macao OR "macedonia (republic)" OR macedonia OR madagascar OR "malagasy republic" OR malawi OR nyasaland OR malaysia OR "malay federation" OR "malaya federation" OR maldives OR "indian ocean islands" OR "indian ocean" OR mali OR malta OR micronesia OR "federated states of micronesia" OR kiribati OR "marshall islands" OR nauru OR "northern mariana islands" OR palau OR tuvalu OR mauritania OR mauritius OR mexico OR moldova OR moldovian OR mongolia OR montenegro OR morocco OR ifni OR mozambique OR "portuguese east africa" OR myanmar OR burma OR namibia OR nepal OR "netherlands antilles" OR nicaragua OR niger OR nigeria OR oman OR muscat OR pakistan OR panama OR "papua new guinea" OR paraguay OR peru OR philippines OR philipines OR phillipines OR phillippines OR poland OR "polish people's republic" OR portugal OR "portuguese republic" OR "puerto rico" OR romania OR russia OR "russian federation" OR ussr OR "soviet union" OR "union of soviet socialist republics" OR rwanda OR ruanda OR samoa OR "pacific islands" OR polynesia OR "samoan islands" OR "navigator island" OR "navigator islands" OR "sao tome and principe" OR "saudi arabia" OR senegal OR serbia OR seychelles OR "sierra leone" OR slovakia OR "slovak republic" OR slovenia OR melanesia OR "solomon island" OR "solomon islands" OR "norfolk island" OR "norfolk islands" OR somalia OR "south africa" OR "south sudan" OR "sri lanka" OR ceylon OR "saint kitts and nevis" OR "st. kitts and nevis" OR "saint lucia" OR "st. lucia" OR "saint vincent and the grenadines" OR "saint vincent" OR "st. vincent" OR grenadines OR sudan OR suriname OR surinam OR "dutch guiana" OR "netherlands guiana" OR syria OR "syrian arab republic" OR tajikistan OR tadjikistan OR tadjhikistan OR tadjhik OR tanzania OR tanganyika OR thailand OR siam OR "timor leste" OR "east timor" OR togo OR "togolese republic" OR tonga OR "trinidad and tobago" OR trinidad OR tobago OR tunisia OR turkey OR "turkey (republic)" OR turkmenistan OR turkmen OR uganda OR ukraine OR uruguay OR uzbekistan OR uzbek OR vanuatu OR "new hebrides" OR venezuela OR vietnam OR "viet nam" OR "middle east" OR "west bank" OR gaza OR palestine OR yemen OR yugoslavia OR zambia OR zimbabwe OR "northern rhodesia" OR "global south" OR "africa south of the sahara" OR "sub saharan africa" OR "subsaharan africa" OR "africa, central" OR "central africa" OR "africa, northern" OR "north africa" OR "northern africa" OR magreb OR maghrib OR sahara OR "africa, southern" OR "southern africa" OR "africa, eastern" OR "east africa" OR "eastern africa" OR "africa, western" OR "west africa" OR "western africa" OR "west indies" OR "indian ocean islands" OR caribbean OR "central america" OR "latin america" OR "south and central america" OR "south america" OR "asia, central" OR "central asia" OR "asia, northern" OR "north asia" OR "northern asia" OR "asia, southeastern" OR "southeastern asia" OR "south eastern asia" OR "southeast asia" OR "south east asia" OR "asia, western" OR "western asia" OR "europe, eastern" OR "east europe" OR "eastern europe" OR "developing country" OR "developing countries" OR "developing nation" OR "developing nations" OR "developing population" OR "developing populations" OR "developing world" OR "less developed country" OR "less developed countries" OR "less developed nation" OR "less developed nations" OR "less developed population" OR "less developed populations" OR "less developed world" OR "lesser developed country" OR "lesser developed countries" OR "lesser developed nation" OR "lesser developed nations" OR "lesser developed population" OR "lesser developed populations" OR "lesser developed world" OR "under developed country" OR "under developed countries" OR "under developed nation" OR "under developed nations" OR "under developed population" OR "under developed populations" OR "under developed world" OR "underdeveloped country" OR "underdeveloped countries" OR "underdeveloped nation" OR "underdeveloped nations" OR "underdeveloped population" OR "underdeveloped populations" OR "underdeveloped world" OR "middle income country" OR "middle income countries" OR "middle income nation" OR "middle income nations" OR

"middle income population" OR "middle income populations" OR "low income country" OR "low income countries" OR "low income nation" OR "low income nations" OR "low income population" OR "low income populations" OR "lower income country" OR "lower income countries" OR "lower income nation" OR "lower income nations" OR "lower income population" OR "lower income populations" OR "underserved country" OR "underserved countries" OR "underserved nation" OR "underserved nations" OR "underserved population" OR "underserved populations" OR "underserved world" OR "under served country" OR "under served countries" OR "under served nation" OR "under served nations" OR "under served population" OR "under served populations" OR "under served world" OR "deprived country" OR "deprived countries" OR "deprived nation" OR "deprived nations" OR "deprived population" OR "deprived populations" OR "deprived world" OR "poor country" OR "poor countries" OR "poor nation" OR "poor nations" OR "poor population" OR "poor populations" OR "poor world" OR "poorer country" OR "poorer countries" OR "poorer nation" OR "poorer nations" OR "poorer population" OR "poorer populations" OR "poorer world" OR "developing economy" OR "developing economies" OR "less developed economy" OR "less developed economies" OR "lesser developed economy" OR "lesser developed economies" OR "under developed economy" OR "under developed economies" OR "underdeveloped economy" OR "underdeveloped economies" OR "middle income economy" OR "middle income economies" OR "low income economy" OR "low income economies" OR "lower income economy" OR "lower income economies" OR "low gdp" OR "low gnp" OR "low gross domestic" OR "low gross national" OR "lower gdp" OR "lower gnp" OR "lower gross domestic" OR "lower gross national" OR "lami" OR "lami countries" OR "third world" OR "lami country" OR "lami countries" OR "transitional country" OR "transitional countries" OR "emerging economies" OR "emerging nation" OR "emerging nations")"

- d) **Web of science:** ("sequential organ failure assessment" OR "systemic inflammatory response syndrome" OR "universal vital assessment" OR "early warning score" AND (mortality OR diagnostic) AND "sepsis")

**Supplementary File S2:** Summary of information required for each prognostic scoring system discussed

| Score             | qSOFA:                     | Point | MEWS:         | Point | UVA:             | Point | SIRS                                        | Point |                                                  |   |                                                  |
|-------------------|----------------------------|-------|---------------|-------|------------------|-------|---------------------------------------------|-------|--------------------------------------------------|---|--------------------------------------------------|
| Respiratory Rate  | ≥22                        | 1     | 15-20         | 1     | ≥30              | 1     | >20                                         | 1     |                                                  |   |                                                  |
|                   |                            |       | 21-29 or <9   | 2     |                  |       |                                             |       |                                                  |   |                                                  |
|                   |                            |       | ≥30           | 3     |                  |       |                                             |       |                                                  |   |                                                  |
| Blood pressure    | ≤100                       | 1     | 81-100        | 1     | <90              | 1     |                                             |       |                                                  |   |                                                  |
|                   |                            |       | 71-80 or ≥200 | 2     |                  |       |                                             |       |                                                  |   |                                                  |
|                   |                            |       | ≤70           | 3     |                  |       |                                             |       |                                                  |   |                                                  |
| GCS or AVPU       | GCS<15                     | 1     | A             | 0     | GCS<15           | 4     |                                             |       |                                                  |   |                                                  |
|                   |                            |       | V             | 1     |                  |       |                                             |       |                                                  |   |                                                  |
|                   |                            |       | P             | 2     |                  |       |                                             |       |                                                  |   |                                                  |
|                   |                            |       | U             | 3     |                  |       |                                             |       |                                                  |   |                                                  |
| Temperature       |                            |       | ≥38.5         | 1     | <36              | 2     | >38°C or <36°C                              | 1     |                                                  |   |                                                  |
|                   |                            |       | <35           | 2     |                  |       |                                             |       |                                                  |   |                                                  |
| Heart Rate        |                            |       |               |       | 101-110 or 41-50 | 1     | ≥120                                        | 1     | >90                                              | 1 |                                                  |
|                   |                            |       |               |       | 111-129 or <40   | 2     |                                             |       |                                                  |   |                                                  |
|                   |                            |       |               |       | ≥130             | 3     |                                             |       |                                                  |   |                                                  |
| White cell count  |                            |       |               |       |                  |       |                                             |       |                                                  |   | >12,000/mm <sup>3</sup> , <4,000/mm <sup>3</sup> |
| Oxygen saturation |                            |       |               |       |                  |       | <92                                         | 2     |                                                  |   |                                                  |
| HIV status        |                            |       |               |       |                  |       | Present                                     | 2     |                                                  |   |                                                  |
| Interpretation    | ≥2: high risk of mortality |       | >4: high risk |       |                  |       | 0-1 low risk, 2-4 medium risk, >4 high risk |       | >2 and source of infection meets sepsis criteria |   |                                                  |



**Supplementary File S3:** Summary for risk of bias of included studies and risk of bias graph for the included studies

|                             | <u>Risk of Bias</u> |            |                    |                 | <u>Applicability Concerns</u> |            |                    |
|-----------------------------|---------------------|------------|--------------------|-----------------|-------------------------------|------------|--------------------|
|                             | Patient Selection   | Index Test | Reference Standard | Flow and Timing | Patient Selection             | Index Test | Reference Standard |
| Aluisio2019                 | ?                   | -          | +                  | +               | ?                             | +          | +                  |
| Boillat-Blanco et al 2018   | ?                   | +          | +                  | +               | +                             | +          | +                  |
| Ergun et al [a] 2013        | -                   | +          | +                  | +               | -                             | +          | +                  |
| Ergun et al [b] 2013        | -                   | +          | +                  | +               | -                             | +          | +                  |
| Fernandes2020               | +                   | +          | +                  | +               | +                             | +          | +                  |
| Huson et al 2017            | +                   | +          | +                  | ?               | +                             | +          | +                  |
| Huson et al 2017            | -                   | -          | +                  | -               | +                             | +          | +                  |
| Khwannimit et al 2018       | -                   | -          | +                  | ?               | +                             | +          | +                  |
| Klinger2021                 | +                   | +          | +                  | +               | +                             | +          | +                  |
| Kristina E. et al 2018      | -                   | +          | +                  | ?               | +                             | +          | +                  |
| Luo et al 2019              | +                   | +          | +                  | +               | +                             | +          | +                  |
| Minn2021                    | +                   | +          | +                  | +               | +                             | +          | +                  |
| Moore et al 2017            | ?                   | +          | +                  | +               | +                             | +          | +                  |
| Muhammad et al [a] 2018     | -                   | +          | +                  | +               | +                             | +          | +                  |
| Muhammad et al [b] 2018     | -                   | +          | +                  | +               | ?                             | +          | +                  |
| Pairattanakorn2020          | +                   | +          | +                  | +               | +                             | +          | +                  |
| Phetsinee et al 2020        | +                   | +          | +                  | +               | +                             | +          | +                  |
| Prangsaï et al2020          | +                   | -          | +                  | +               | +                             | +          | +                  |
| Raphael Kazidule et al 2020 | +                   | +          | +                  | ?               | +                             | +          | +                  |
| Robert Sinto 2019           | +                   | +          | +                  | +               | +                             | +          | +                  |
| Ruangsomboon2021            | +                   | +          | -                  | +               | +                             | +          | +                  |
| Schmedding et al 2019       | +                   | +          | +                  | +               | +                             | +          | +                  |
| Tian et al 2019             | ?                   | ?          | +                  | ?               | +                             | +          | +                  |
| Toker2021                   | +                   | -          | ?                  | ?               | +                             | +          | +                  |
| Wei et al 2019              | +                   | +          | +                  | +               | +                             | +          | +                  |
| Xie et al 2018              | +                   | +          | +                  | +               | +                             | +          | +                  |
| Yu et al 2019               | ?                   | ?          | +                  | +               | +                             | +          | +                  |

- High     
 ? Unclear     
 + Low

**Supplementary File S4.** List of rejected articles

|   | <b>Authors</b> | <b>year</b> | <b>Titles</b>                                                                                                                               | <b>Reason</b>                                       |
|---|----------------|-------------|---------------------------------------------------------------------------------------------------------------------------------------------|-----------------------------------------------------|
| 1 | Lane et al     | 2020        | Epidemiology and patient predictors of infection and sepsis in the prehospital setting                                                      | Score performance not reported or insufficient data |
| 2 | Daniel et al   | 2020        | comparison of different steroid regimes in critically ill adult patients of COVID-19                                                        | Score performance not reported or insufficient data |
| 3 | Hope et al     | 2017        | Factors associated with vulnerability after hospitalization in critically ill adults at high risk of acute respiratory distress syndrome    | Score performance not reported or insufficient data |
| 4 | Huerta et al   | 2018        | Validation of an electronic sequential organ failure assessment score in intensive care unit patients                                       | Score performance not reported or insufficient data |
| 5 | Barton et al   | 2018        | Predicting patient mortality: using machine learning to identify at-risk patients and improve outcomes                                      | Study performed in not LMIC                         |
| 6 | Kelly et al    | 2016        | Combined biomarkers discriminate a low likelihood of bacterial infection among surgical intensive care unit patients with suspected sepsis. | Score performance not reported or insufficient data |
| 7 | Jones et al    | 1998        | Assessment criteria in identifying the sick sepsis patient.                                                                                 | Review                                              |
| 8 | Forward et al  | 2017        | Predictive validity of the qSOFA criteria for sepsis in non-ICU inpatients.                                                                 | Study performed in not LMIC                         |
| 9 | Micek et al    | 2003        | Management of severe sepsis: integration of multiple pharmacologic interventions.                                                           | Score performance not reported or insufficient data |



|    |                      |      |                                                                                                                                                                                                                          |                                                     |
|----|----------------------|------|--------------------------------------------------------------------------------------------------------------------------------------------------------------------------------------------------------------------------|-----------------------------------------------------|
| 10 | García-Gigorro et al | 2019 | Application of the new Sepsis-3 definition in a cohort of patients with severe sepsis and septic shock admitted to Intensive Care Unit from the Emergency Department.                                                    | Study performed in not LMIC                         |
| 11 | Kashefi et al        | 2019 | Comparison of sequential organ failure assessment and acute physiology and chronic health evaluation III scoring systems on detection prognosis of mortality in patients with trauma admitted to the intensive care unit | Not eligible study population                       |
| 12 | Jaqua et al          | 2012 | Adult-Onset Still's Disease Masquerading as Sepsis in an Asplenic Active-Duty Soldier.                                                                                                                                   | Not eligible study population                       |
| 13 | Franchini et al      | 2019 | SIRS or qSOFA? Is that the question? Clinical and methodological observations from a meta-analysis and critical review on the prognostication of patients with suspected sepsis outside the ICU                          | Review                                              |
| 14 | Schlichting et al    | 2007 | Recognizing and managing severe sepsis: a common and deadly threat.                                                                                                                                                      | Review                                              |
| 15 | Rey et al            | 2007 | Procalcitonin and C-reactive protein as markers of systemic inflammatory response syndrome severity in critically ill children.                                                                                          | Score performance not reported or insufficient data |
| 16 | van et al            | 2016 | Epidemiology of Sepsis and Its Recognition by Emergency Medical Services Personnel in the Netherlands.                                                                                                                   | Score performance not reported or insufficient data |
| 17 | Salomão et al        | 2019 | Sepsis: evolving concepts and challenges.                                                                                                                                                                                | Review                                              |
| 18 | Tai et al            | 2019 | Utilization of systemic inflammatory response syndrome criteria in predicting mortality among geriatric patients with influenza in the emergency department                                                              | Not eligible study population                       |
| 19 | Wang et al           | 2017 | The authors respond to qSOFA predicting outcomes in patients with infection some lingering doubts                                                                                                                        | Not original article                                |

|    |                     |      |                                                                                                                                 |                                                     |
|----|---------------------|------|---------------------------------------------------------------------------------------------------------------------------------|-----------------------------------------------------|
| 20 | Teparrukkul et al   | 2019 | Utility of qSOFA and modified SOFA in severe malaria presenting as sepsis.                                                      | Score performance not reported or insufficient data |
| 21 | Schlattmann et al   | 2014 | Procalcitonin as a diagnostic marker for sepsis.                                                                                | Score performance not reported or insufficient data |
| 22 | Kim et al           | 2019 | Sepsis: early recognition and optimized treatment                                                                               | Not original article                                |
| 23 | Choi et al          | 2019 | Prognostic performance of disease severity scores in patients with septic shock presenting to the emergency department.         | Study performed in not LMIC                         |
| 24 | Francisco et al     | 2018 | Risk factors for long-term mortality in patients admitted with severe infection.                                                | Score performance not reported or insufficient data |
| 25 | Wade et al          | 1998 | [Epidemiology of systemic inflammatory response syndrome infection and septic shock in surgical intensive care patients].       | Not eligible study population                       |
| 26 | Wu et al            | 2019 | Accuracy Comparison Between Age-Adapted SOFA and SIRS in Predicting in-Hospital Mortality of Infected Children at China's PICU. | Not eligible study population                       |
| 27 | Gille-Johnson et al | 2013 | Severe sepsis and systemic inflammatory response syndrome in emergency department patients with suspected severe infection.     | Study performed in not LMIC                         |
| 28 | Routsi et al        | 2007 | Application of the sequential organ failure assessment (SOFA) score to bacteremic ICU patients.                                 | Score performance not reported or insufficient data |
| 29 | Silva et al         | 2004 | Brazilian Sepsis Epidemiological Study (BASES study).                                                                           | Score performance not reported or insufficient data |
| 30 | Wanner et al        | 2000 | Relationship between procalcitonin plasma levels and severity of injury sepsis organ failure and mortality in injured patients. | Score performance not reported or insufficient data |
| 31 | Jekarl et al        | 2015 | Diagnosis and evaluation of severity of sepsis via the use of biomarkers and profiles of 13 cytokines: a multiplex analysis.    | Score performance not reported or insufficient data |

|    |                     |      |                                                                                                                                                                                                  |                                                     |
|----|---------------------|------|--------------------------------------------------------------------------------------------------------------------------------------------------------------------------------------------------|-----------------------------------------------------|
| 32 | Bewersdorf et al    | 2017 | The SPEED (sepsis patient evaluation in the emergency department) score: a risk stratification and outcome prediction tool.                                                                      | Score performance not reported or insufficient data |
| 33 | Amland et al        | 2018 | Quick Sequential [Sepsis-Related] Organ Failure Assessment (qSOFA) and St. John Sepsis Surveillance Agent to Detect Patients at Risk of Sepsis: An Observational Cohort Study.                   | Study performed in not LMIC                         |
| 34 | Jones et al         | 2016 | The Sepsis Early Recognition and Response Initiative (SERRI).                                                                                                                                    | Not original article                                |
| 35 | Cecconi et al       | 2018 | Sepsis and septic shock.                                                                                                                                                                         | Not original article                                |
| 36 | Martínez et al      | 2001 | [Sepsis and bacteremia].                                                                                                                                                                         | Not original article                                |
| 37 | Bhattacharjee et al | 2017 | Detecting Sepsis: Are Two Opinions Better Than One?                                                                                                                                              | Score performance not reported or insufficient data |
| 38 | Umemura et al       | 2017 | Assessment of mortality by qSOFA in patients with sepsis outside ICU: A post hoc subgroup analysis by the Japanese Association for Acute Medicine Sepsis Registry Study Group.                   | Study performed in not LMIC                         |
| 39 | Ramos-Rincón et al  | 2019 | The quick Sepsis-related Organ Failure Assessment (qSOFA) is a good predictor of in-hospital mortality in very elderly patients with bloodstream infections: A retrospective observational study | Study performed in not LMIC                         |
| 40 | King et al          | 2007 | Sepsis in critical care.                                                                                                                                                                         | Not original article                                |
| 41 | Camm et al          | 2018 | Sepsis recognition tools in acute ambulatory care: associations with process of care and clinical outcomes in a service evaluation of an Emergency Multidisciplinary Unit in Oxfordshire.        | Study performed in not LMIC                         |
| 42 | Lamontagne et al    | 2017 | qSOFA for Identifying Sepsis Among Patients With Infection.                                                                                                                                      | Study performed in not LMIC                         |

|    |                 |      |                                                                                                                                                                                     |                                                     |
|----|-----------------|------|-------------------------------------------------------------------------------------------------------------------------------------------------------------------------------------|-----------------------------------------------------|
| 43 | Kang et al      | 2011 | Risk factors and pathogenic significance of severe sepsis and septic shock in 2286 patients with gram-negative bacteremia.                                                          | Score performance not reported or insufficient data |
| 44 | Yu et al        | 2014 | Comparison of risk prediction scoring systems for ward patients: a retrospective nested case-control study.                                                                         | Study performed in not LMIC                         |
| 45 | Moskowitz et al | 2017 | Quick Sequential Organ Failure Assessment and Systemic Inflammatory Response Syndrome Criteria as Predictors of Critical Care Intervention Among Patients With Suspected Infection. | Study performed in not LMIC                         |
| 46 | Hamed et al     | 2017 | Diagnostic value of Pentraxin-3 in patients with sepsis and septic shock in accordance with latest sepsis-3 definitions                                                             | Score performance not reported or insufficient data |
| 47 | TrancÄf et al   | 2016 | Can APACHE II SOFA ISS and RTS Severity Scores be used to Predict Septic Complications in Multiple Trauma Patients?                                                                 | Score performance not reported or insufficient data |
| 48 | Singh et al     | 2020 | Epidemiology and Management Trends of Patients With Sepsis and Septic Shock in the Intensive Care Unit: A Prospective Trial in the Caribbean.                                       | Score performance not reported or insufficient data |
| 49 | Stephen et al   | 2020 | Sepsis and Septic Shock in Low- and Middle-Income Countries.                                                                                                                        | Review                                              |
| 50 | Hofer et al     | 2012 | Definitions of SIRS and sepsis in correlation with early and late onset neonatal sepsis.                                                                                            | Not eligible study population                       |
| 51 | Serafim et al   | 2018 | A Comparison of the Quick-SOFA and Systemic Inflammatory Response Syndrome Criteria for the Diagnosis of Sepsis and Prediction of Mortality: A Systematic Review and Meta-Analysis  | Review                                              |
| 52 | McLymont et al  | 2016 | Scoring systems for the characterization of sepsis and associated outcomes.                                                                                                         | Not original article                                |

|    |                   |      |                                                                                                                                                     |                                                     |
|----|-------------------|------|-----------------------------------------------------------------------------------------------------------------------------------------------------|-----------------------------------------------------|
| 53 | Mayr et al        | 2014 | Epidemiology of severe sepsis.                                                                                                                      | Score performance not reported or insufficient data |
| 54 | Hill et al        | 2018 | Predictors for Identifying Burn Sepsis and Performance vs Existing Criteria.                                                                        | Not eligible study population                       |
| 55 | Christensen et al | 2007 | [Sepsis in the critically-ill patient].                                                                                                             | Score performance not reported or insufficient data |
| 56 | Hryckiewicz et al | 2006 | Procalcitonin as a diagnostic marker in systemic inflammatory response syndrome (SIRS) and sepsis                                                   | Score performance not reported or insufficient data |
| 57 | Bossink et al     | 1998 | Prediction of mortality in febrile medical patients: How useful are systemic inflammatory response syndrome and sepsis criteria?                    | Study performed in not LMIC                         |
| 58 | Bloos et al       | 2015 | Clinical diagnosis of sepsis and the combined use of biomarkers and culture- and non-culture-based assays.                                          | Score performance not reported or insufficient data |
| 59 | Gao et al         | 2020 | Prognostic value of the combined variability of mean platelet volume and neutrophil percentage for short-term clinical outcomes of sepsis patients. | Score performance not reported or insufficient data |
| 60 | Lindner et al     | 2016 | An Algorithm for Systemic Inflammatory Response Syndrome Criteria-Based Prediction of Sepsis in a Polytrauma Cohort.                                | Not eligible study population                       |
| 61 | Falsetti et al    | 2020 | SOFA and qSOFA usefulness for in-hospital death prediction of elderly patients admitted for suspected infection in internal medicine.               | Study performed in not LMIC                         |
| 62 | Mark et al        | 2017 | QSOFA Outperforms CRB CRB-65 and CRB-65 plus: a multicenter US observational study                                                                  | Study performed in not LMIC                         |
| 63 | Gando et al       | 2020 | The SIRS criteria have better performance for predicting infection than qSOFA scores in the emergency department.                                   | Study performed in not LMIC                         |

|    |                  |      |                                                                                                                                                                                                                                          |                                                     |
|----|------------------|------|------------------------------------------------------------------------------------------------------------------------------------------------------------------------------------------------------------------------------------------|-----------------------------------------------------|
| 64 | Fernando et al   | 2018 | Sepsis-3 Septic Shock Criteria and Associated Mortality Among Infected Hospitalized Patients Assessed by a Rapid Response Team.                                                                                                          | Study performed in not LMIC                         |
| 65 | Jaimes et al     | 2003 | The systemic inflammatory response syndrome (SIRS) to identify infected patients in the emergency room.                                                                                                                                  | Study performed in not LMIC                         |
| 66 | Yousef et al     | 2013 | The predictive prognostic values of serum TNF- $\alpha$ in comparison to SOFA score monitoring in critically ill patients.                                                                                                               | Score performance not reported or insufficient data |
| 67 | Vaittinada et al | 2019 | Prognostic value of prehospital quick sequential organ failure assessment score among patients with suspected infection.                                                                                                                 | Study performed in not LMIC                         |
| 68 | Poeze et al      | 2000 | Decreased organ failure in patients with severe SIRS and septic shock treated with the platelet-activating factor antagonist TCV-309: a prospective multicenter double-blind randomized phase II trial. TCV-309 Septic Shock Study Group | Score performance not reported or insufficient data |
| 69 | Mak et al        | 2019 | A prospective validation of Sepsis-3 guidelines in acute hepatobiliary sepsis: qSOFA lacks sensitivity and SIRS criteria lacks specificity (Cohort Study).                                                                               | Not eligible study population                       |
| 70 | Liu et al        | 2021 | Predictive value of immune cell counts and neutrophil-to-lymphocyte ratio for 28-day mortality in patients with sepsis caused by intra-abdominal infection.                                                                              | Score performance not reported or insufficient data |
| 71 | Gustot et al     | 2011 | Multiple organ failure in sepsis: prognosis and role of systemic inflammatory response.                                                                                                                                                  | Score performance not reported or insufficient data |
| 72 | Wong et al       | 2015 | Systemic inflammatory response syndrome (SIRS) is a major determinant of treatment response to terlipressin for hepatorenal syndrome type 1 (HRS-1)                                                                                      | Score performance not reported or insufficient data |

|    |                  |      |                                                                                                                                                                                     |                                                     |
|----|------------------|------|-------------------------------------------------------------------------------------------------------------------------------------------------------------------------------------|-----------------------------------------------------|
| 73 | Lo et al         | 2019 | qSOFA is a Poor Predictor of Short-Term Mortality in All Patients: A Systematic Review of 410000 Patients.                                                                          | Review                                              |
| 74 | Zeigler et al    | 2021 | Sepsis and Mortality Prediction in Very Low Birth Weight Infants: Analysis of HeRO and nSOFA.                                                                                       | Not eligible study population                       |
| 75 | Schlapbach et al | 2018 | Prognostic accuracy of age-adapted SOFA SIRS PELOD-2 and qSOFA for in-hospital mortality among children with suspected infection admitted to the intensive care unit.               | Not eligible study population                       |
| 76 | Li et al         | 2021 | Prediction of median survival time in sepsis patients by the SOFA score combined with different predictors                                                                          | Score performance not reported or insufficient data |
| 77 | Jones et al      | 2009 | The Sequential Organ Failure Assessment score for predicting outcome in patients with severe sepsis and evidence of hypoperfusion at the time of emergency department presentation. | Score performance not reported or insufficient data |
| 78 | Estella et al    | 2018 | Prognostic accuracy of qsofa according to the site of infection in older patient attended in Emergency Department.                                                                  | Study performed in not LMIC                         |
| 79 | Sen et al        | 2019 | Diagnostic and prognostic value of new bioscore in critically ill septic patients.                                                                                                  | Score performance not reported or insufficient data |
| 80 | Javed et al      | 2017 | Clinical predictors of early death from sepsis                                                                                                                                      | Score performance not reported or insufficient data |
| 81 | Jacobson et al   | 2012 | Sequential organ failure assessment (SOFA) scores differ between genders in a sepsis cohort: cause or effect?                                                                       | Score performance not reported or insufficient data |
| 82 | Yu et al         | 2017 | Performance assessment of the SAPS II and SOFA scoring systems in Hanta virus Hemorrhagic Fever with Renal Syndrome.                                                                | Score performance not reported or insufficient data |

|    |                   |      |                                                                                                                                                                                                                      |                                                     |
|----|-------------------|------|----------------------------------------------------------------------------------------------------------------------------------------------------------------------------------------------------------------------|-----------------------------------------------------|
| 83 | Kesselmeier et al | 2020 | Validation of the qSOFA score compared to the CRB-65 score for risk prediction in community-acquired pneumonia.                                                                                                      | Study performed in not LMIC                         |
| 84 | Chu et al         | 2020 | Prognostic accuracy of SIRS criteria and qSOFA score for in-hospital mortality among influenza patients in the emergency department.                                                                                 | Not eligible study population                       |
| 85 | Pandey et al      | 2019 | Quick Sequential (Sepsis Related) Organ Failure Assessment: A high performance rapid prognostication tool in patients having acute pyelonephritis with upper urinary tract calculi.                                  | Not eligible study population                       |
| 86 | Otani et al       | 2021 | Clinical prediction rule is more useful than qSOFA and the Sepsis-3 definition of sepsis for screening bacteremia.                                                                                                   | Score performance not reported or insufficient data |
| 87 | Karakike et al    | 2019 | The early change of SOFA score as a prognostic marker of 28-day sepsis mortality: analysis through a derivation and a validation cohort                                                                              | Score performance not reported or insufficient data |
| 88 | Lind et al        | 2021 | Predictive Value of 3 Clinical Criteria for Sepsis (Quick Sequential Organ Failure Assessment Systemic Inflammatory Response Syndrome and National Early Warning Score) With Respect to Short-term Mortality in AI   | Study performed in not LMIC                         |
| 89 | Canet et al       | 2018 | qSOFA as predictor of mortality and prolonged ICU admission in Emergency Department patients with suspected infection.                                                                                               | Study performed in not LMIC                         |
| 90 | Devia et al       | 2021 | Quick Sequential Organ Failure Assessment Sequential Organ Failure Assessment and Procalcitonin for Early Diagnosis and Prediction of Death in Elderly Patients with Suspicion of Sepsis in the Emergency Department | Not eligible study population                       |



|     |                |      |                                                                                                                                                         |                                                     |
|-----|----------------|------|---------------------------------------------------------------------------------------------------------------------------------------------------------|-----------------------------------------------------|
| 91  | Yeh et al      | 2020 | Quick-SOFA score $\geq 2$ predicts prolonged hospital stay in geriatric patients with influenza infection.                                              | Not eligible study population                       |
| 92  | Zhou et al     | 2018 | It is SOFA score rather than quick SOFA (qSOFA) score that constitutes the clinical criteria of sepsis.                                                 | Not original article                                |
| 93  | Hassan et al   | 2016 | Validation of a modified sequential organ failure assessment cardiovascular score                                                                       | Not eligible study population                       |
| 94  | Abdullah et al | 2020 | qSOFA is a useful prognostic factor for 30-day mortality in infected patients fulfilling the SIRS criteria for sepsis.                                  | Study performed in not LMIC                         |
| 95  | Guarino et al  | 2021 | Predicting in-hospital mortality for sepsis: a comparison between qSOFA and modified qSOFA in a 2-year single-centre retrospective analysis.            | Study performed in not LMIC                         |
| 96  | Agnello et al  | 2021 | A new tool for sepsis screening in the Emergency Department.                                                                                            | Score performance not reported or insufficient data |
| 97  | Boonmee et al  | 2020 | Predictors of Mortality in Elderly and Very Elderly Emergency Patients with Sepsis: A Retrospective Study.                                              | Not eligible study population                       |
| 98  | Pjević et al   | 2001 | [Prevention of multiple organ dysfunction syndrome in severely injured patients—current approach].                                                      | Score performance not reported or insufficient data |
| 99  | Paary et al    | 2016 | Clinical profile and outcome of patients with severe sepsis treated in an intensive care unit in India.                                                 | Score performance not reported or insufficient data |
| 100 | Sohn et al     | 2019 | Validation of quick sequential organ failure assessment score for poor outcome prediction among emergency department patients with suspected infection. | Study performed in not LMIC                         |

|     |                 |      |                                                                                                                                                                                                                 |                                                     |
|-----|-----------------|------|-----------------------------------------------------------------------------------------------------------------------------------------------------------------------------------------------------------------|-----------------------------------------------------|
| 101 | Lai et al       | 2018 | Comparing AIMS65 Score With MEWS qSOFA Score Glasgow-Blatchford Score and Rockall Score for Predicting Clinical Outcomes in Cirrhotic Patients With Upper Gastrointestinal Bleeding.                            | Not eligible study population                       |
| 102 | Greenberg et al | 2016 | Sequential Organ Failure Assessment Score Modified for Recent Infection in Patients With Hematologic Malignant Tumors and Severe Sepsis.                                                                        | Not eligible study population                       |
| 103 | Huang et al     | 2015 | Epidemiology and Outcome of Severe Sepsis and Septic Shock in Surgical Intensive Care Units in Northern Taiwan.                                                                                                 | Score performance not reported or insufficient data |
| 104 | Rannikko et al  | 2018 | Plasma cell-free DNA and qSOFA score predict 7-day mortality in 481 emergency department bacteraemia patients.                                                                                                  | Study performed in not LMIC                         |
| 105 | Bossi et al     | 2004 | [Diagnosis of sepsis severe sepsis and septic shock].                                                                                                                                                           | Score performance not reported or insufficient data |
| 106 | Knaus et al     | 1996 | Use of predicted risk of mortality to evaluate the efficacy of anticytokine therapy in sepsis. The rhIL-1ra Phase III Sepsis Syndrome Study Group                                                               | Score performance not reported or insufficient data |
| 107 | Pawar et al     | 2020 | Variation in SOFA (Sequential Organ Failure Assessment) Score Performance in Different Infectious States.                                                                                                       | Score performance not reported or insufficient data |
| 108 | Valik et al     | 2020 | Validation of automated sepsis surveillance based on the Sepsis-3 clinical criteria against physician record review in a general hospital population: observational study using electronic health records data. | Study performed in not LMIC                         |
| 109 | Kishihara et al | 2016 | A study of patients with sepsis who have discrepancy between lactate levels and ScvO2                                                                                                                           | Score performance not reported or insufficient data |
| 110 | Balk et al      | 2014 | Systemic inflammatory response syndrome (SIRS): where did it come from and is it still relevant today?                                                                                                          | Not original article                                |

|     |                 |      |                                                                                                                                                                                    |                                                     |
|-----|-----------------|------|------------------------------------------------------------------------------------------------------------------------------------------------------------------------------------|-----------------------------------------------------|
| 111 | Schmidt et al   | 2014 | Sepsis survivors monitoring and coordination in outpatient health care (SMOOTH): study protocol for a randomized controlled trial                                                  | Not eligible study population                       |
| 112 | Askim et al     | 2017 | Poor performance of quick-SOFA (qSOFA) score in predicting severe sepsis and mortality - a prospective study of patients admitted with infection to the emergency department.      | Study performed in not LMIC                         |
| 113 | Georgescu et al | 2014 | Predicting scores correlations in patients with septic shock - a cohort study.                                                                                                     | Score performance not reported or insufficient data |
| 114 | Petersen et al  | 2016 | Frequency of early warning score assessment and clinical deterioration in hospitalized patients: a randomized trial                                                                | Study performed in not LMIC                         |
| 115 | Kim et al       | 2019 | Quick Sepsis-related Organ Failure Assessment score is not sensitive enough to predict 28-day mortality in emergency department patients with sepsis: a retrospective review.      | Study performed in not LMIC                         |
| 116 | Kotani et al    | 2019 | Modification of sequential organ failure assessment score using acute kidney injury classification                                                                                 | Not eligible study population                       |
| 117 | Helj et al     | 1999 | [Septic conditions: a syndrome of multiorgan dysfunction].                                                                                                                         | Not eligible study population                       |
| 118 | Prabhakar et al | 2019 | Combining quick sequential organ failure assessment score with heart rate variability may improve predictive ability for mortality in septic patients at the emergency department. | Study performed in not LMIC                         |
| 119 | Sharma et al    | 2020 | Quick sequential organ failure assessment score and systemic inflammatory response syndrome in community acquired pneumonia.                                                       | Not eligible study population                       |
| 120 | Lane et al      | 2020 | Classification versus Prediction of Mortality Risk using the SIRS and qSOFA Scores in Patients with Infection Transported by Paramedics.                                           | Study performed in not LMIC                         |

|     |                |      |                                                                                                                                                                                                                     |                                                     |
|-----|----------------|------|---------------------------------------------------------------------------------------------------------------------------------------------------------------------------------------------------------------------|-----------------------------------------------------|
| 121 | Parks et al    | 2019 | Predictive Accuracy of Quick Sequential Organ Failure Assessment for Hospital Mortality Decreases With Increasing Comorbidity Burden Among Patients Admitted for Suspected Infection.                               | Study performed in not LMIC                         |
| 122 | Vosylius et al | 2004 | Sequential organ failure assessment score as the determinant of outcome for patients with severe sepsis.                                                                                                            | Score performance not reported or insufficient data |
| 123 | Hao et al      | 2021 | [Combined prognostic value of serum lactic acid procalcitonin and severity score for short-term prognosis of septic shock patients].                                                                                | Score performance not reported or insufficient data |
| 124 | Yoon et al     | 2018 | Comparative Usefulness of Sepsis-3 Burn Sepsis and Conventional Sepsis Criteria in Patients With Major Burns.                                                                                                       | Not eligible study population                       |
| 125 | Qin et al      | 2020 | Predictive value of the sequential organ failure assessment (SOFA) score for prognosis in patients with severe acute ischemic stroke: a retrospective study.                                                        | Not eligible study population                       |
| 126 | González et al | 2017 | Prognostic accuracy of SIRS criteria qSOFA score and GYM score for 30-day-mortality in older non-severely dependent infected patients attended in the emergency department                                          | Study performed in not LMIC                         |
| 127 | Brabrand et al | 2016 | Validation of the qSOFA score for identification of septic patients: A retrospective study.                                                                                                                         | Study performed in not LMIC                         |
| 128 | Zhang et al    | 2020 | Validation of prognostic accuracy of the SOFA score SIRS criteria and qSOFA score for in-hospital mortality among cardiac- thoracic- and vascular-surgery patients admitted to a cardiothoracic intensive care unit | Not eligible study population                       |

|     |                  |      |                                                                                                                                                                                                                   |                                                     |
|-----|------------------|------|-------------------------------------------------------------------------------------------------------------------------------------------------------------------------------------------------------------------|-----------------------------------------------------|
| 129 | Koch et al       | 2020 | Comparison of qSOFA score SOFA score and SIRS criteria for the prediction of infection and mortality among surgical intermediate and intensive care patients.                                                     | Not eligible study population                       |
| 130 | Park et al       | 2017 | Quick sequential organ failure assessment compared to systemic inflammatory response syndrome for predicting sepsis in emergency department                                                                       | Study performed in not LMIC                         |
| 131 | Mellhammar et al | 2019 | NEWS2 is Superior to qSOFA in Detecting Sepsis with Organ Dysfunction in the Emergency Department                                                                                                                 | Study performed in not LMIC                         |
| 132 | Fortini et al    | 2021 | Prevalence and in-hospital outcome of patients with sepsis in an internal medicine ward.                                                                                                                          | Score performance not reported or insufficient data |
| 133 | Quinten et al    | 2018 | Sepsis patients in the emergency department: stratification using the Clinical Impression Score Predisposition Infection Response and Organ dysfunction score or quick Sequential Organ Failure Assessment score? | Study performed in not LMIC                         |
| 134 | Goulden et al    | 2018 | qSOFA SIRS and NEWS for predicting in hospital mortality and ICU admission in emergency admissions treated as sepsis                                                                                              | Study performed in not LMIC                         |
| 135 | Green et al      | 2018 | Comparison of the Between the Flags calling criteria to the MEWS NEWS and the electronic Cardiac Arrest Risk Triage (eCART) score for the identification of deteriorating ward patients                           | Not eligible study population                       |
| 136 | Raju et al       | 2013 | Modified early warning score (MEWS) as a prediction tool for intensive care unit (ICU) admissions                                                                                                                 | Not original article                                |
| 137 | van et al        | 2018 | Classifying sepsis patients in the emergency department using SIRS qSOFA or MEWS                                                                                                                                  | Study performed in not LMIC                         |

|     |                  |      |                                                                                                                                                                                              |                                                     |
|-----|------------------|------|----------------------------------------------------------------------------------------------------------------------------------------------------------------------------------------------|-----------------------------------------------------|
| 138 | Almutary et al   | 2020 | National Early Warning Score (NEWS) as Prognostic Triage Tool for Septic Patients.                                                                                                           | Score performance not reported or insufficient data |
| 139 | Kang et al       | 2019 | Machine learning algorithm to predict mortality in patients undergoing continuous renal replacement therapy                                                                                  | Not eligible study population                       |
| 140 | Williams et al   | 2017 | Systemic Inflammatory Response Syndrome Quick Sequential Organ Function Assessment and Organ Dysfunction: Insights from a Prospective Database of ED Patients with Infection                 | Study performed in not LMIC                         |
| 141 | Kayani et al     | 2021 | A prospective randomized controlled trial comparing the systemic inflammatory response in conventional jig-based total knee arthroplasty versus robotic-arm assisted total knee arthroplasty | Score performance not reported or insufficient data |
| 142 | Lemachatti et al | 2019 | Early variation of quick sequential organ failure assessment score to predict in-hospital mortality in emergency department patients with suspected infection.                               | Study performed in not LMIC                         |
| 143 | Poutsiaka et al  | 2019 | Prospective Observational Study Comparing Sepsis-2 and Sepsis-3 Definitions in Predicting Mortality in Critically Ill Patients.                                                              | Study performed in not LMIC                         |
| 144 | Shafik et al     | 2019 | The utility of systemic inflammatory response syndrome (SIRS) for diagnosing sepsis in the immediate postpartum period                                                                       | Not eligible study population                       |
| 145 | Geier et al      | 2013 | Severity illness scoring systems for early identification and prediction of in-hospital mortality in patients with suspected sepsis presenting to the emergency department.                  | Study performed in not LMIC                         |
| 146 | Laura et al      | 2020 | Implementing a quick Sequential [Sepsis-Related] Organ Failure Assessment sepsis screening tool: an interrupted times series                                                                 | Not eligible study population                       |

|     |               |      |                                                                                                                                       |                                                     |
|-----|---------------|------|---------------------------------------------------------------------------------------------------------------------------------------|-----------------------------------------------------|
| 147 | Meghan et al  | 2020 | Prevalence Aetiology and Outcome of Sepsis among Critically Ill Patients in Malawi                                                    | Score performance not reported or insufficient data |
| 148 | Chen et al    | 2019 | Predictive accuracy of Sepsis-3 definitions for mortality among adult critically ill patients with suspected infection                | Score performance not reported or insufficient data |
| 149 | Rosa et al    | 2017 | Does SOFA predict outcomes better than SIRS in Brazilian ICU patients with suspected infection? A retrospective cohort study          | Score performance not reported or insufficient data |
| 150 | Xiaoyun et al | 2021 | Clinical observation and analysis on the significance of quick sequential organ failure assessment in 74 non-ICU patients with sepsis | Score performance not reported or insufficient data |

**Supplementary File S5:** Funnel plots assessing publication bias. A: qSOFA funnel plot; B: SIRS funnel plot; C: MEWS funnel plot; D: UVA funnel plot

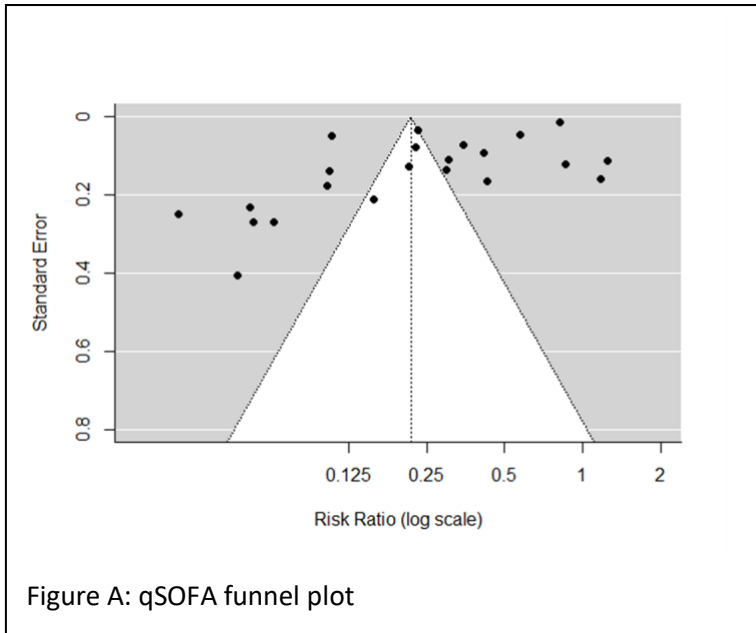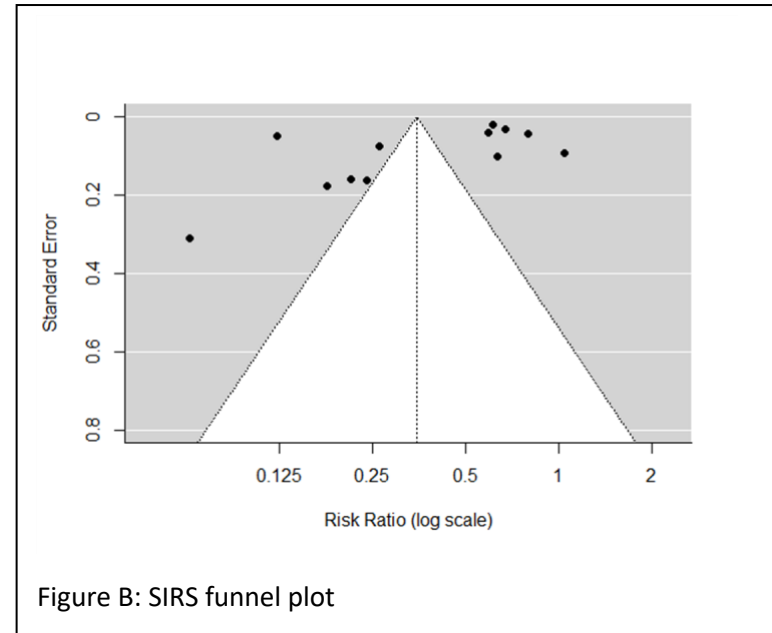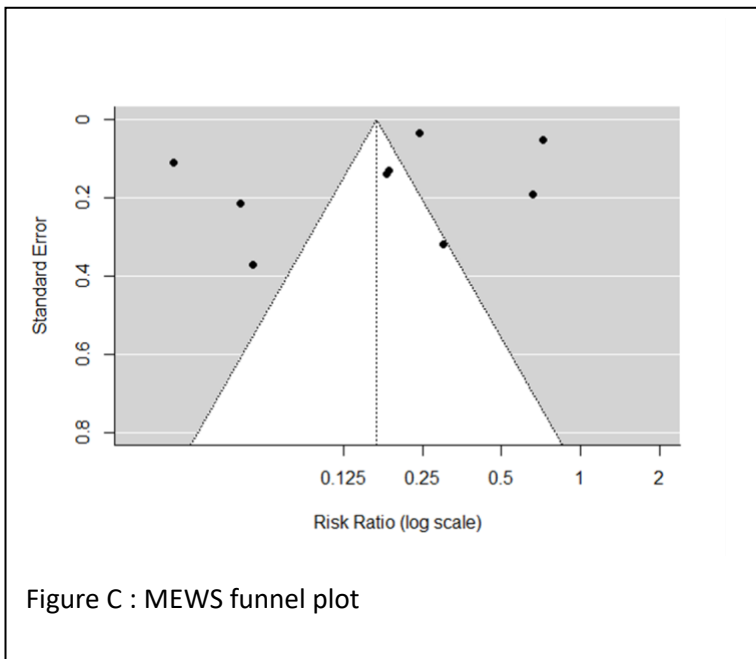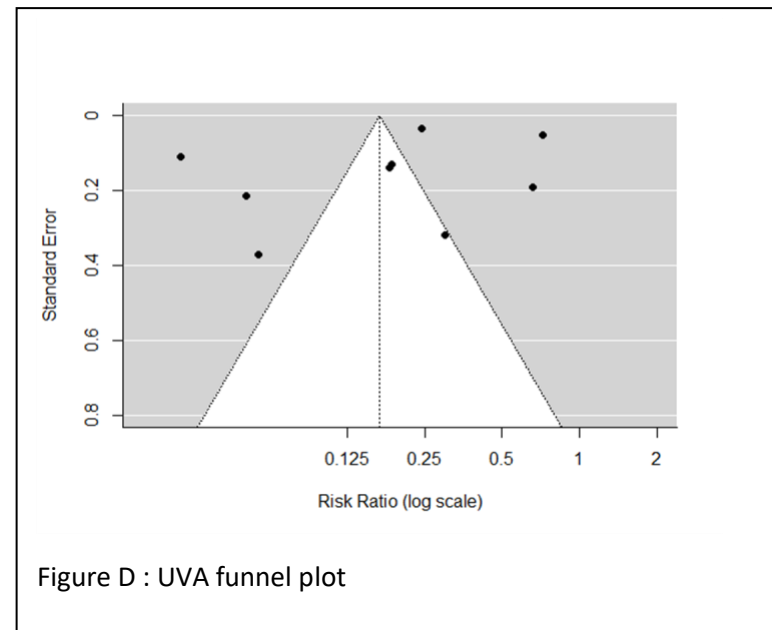

Supplement: mmc2.pdf [file mmc2.pdf]
